# Supplementary material for: PDGFR Signaling Mediates Hyperproliferation and Fibrotic Responses of Subsynovial Connective Tissue Cells in Idiopathic Carpal Tunnel Syndrome
Source: PubMed Central journal article supplement (PMC5700922; doi:10.1038/s41598-017-16443-w), 2017-11-23
Supplement: 41598_2017_16443_MOESM1_ESM.pdf [file 41598_2017_16443_MOESM1_ESM.pdf]

# PDGFR Signaling Mediates Hyperproliferation and Fibrotic Responses of Subsynovial

## Connective Tissue Cells in Idiopathic Carpal Tunnel Syndrome

|                                            |                                                                              |
|--------------------------------------------|------------------------------------------------------------------------------|
| Yuki Saito, M.S. <sup>1</sup>              | E-mail: <a href="mailto:yuki.saito@sapmed.ac.jp">yuki.saito@sapmed.ac.jp</a> |
| Takako Chikenji, Ph.D. <sup>1,*</sup>      | E-mail: <a href="mailto:chikenji@sapmed.ac.jp">chikenji@sapmed.ac.jp</a>     |
| Yasuhiro Ozasa, M.D., Ph.D. <sup>2</sup>   | E-mail: <a href="mailto:yozasa@sapmed.ac.jp">yozasa@sapmed.ac.jp</a>         |
| Mineko Fujimiya, MD, Ph.D. <sup>1</sup>    | E-mail: <a href="mailto:fujimiya@sapmed.ac.jp">fujimiya@sapmed.ac.jp</a>     |
| Toshihiko Yamashita, MD, PhD. <sup>2</sup> | E-mail: <a href="mailto:tyamasit@sapmed.ac.jp">tyamasit@sapmed.ac.jp</a>     |
| Anne Gingery, Ph.D. <sup>3</sup>           | E-mail: <a href="mailto:gingery.anne@mayo.edu">gingery.anne@mayo.edu</a>     |
| Kousuke Iba, M.D., Ph.D. <sup>2</sup>      | E-mail: <a href="mailto:iba@sapmed.ac.jp">iba@sapmed.ac.jp</a>               |

<sup>1</sup>. Department of Anatomy, Sapporo Medical University School of Medicine, Sapporo, Japan.

<sup>2</sup>. Department of Orthopaedic Surgery, Sapporo Medical University School of Medicine, Sapporo, Japan.

<sup>3</sup>. Department of Orthopedic Surgery, Mayo Clinic, Rochester, Minnesota.

\* Corresponding author

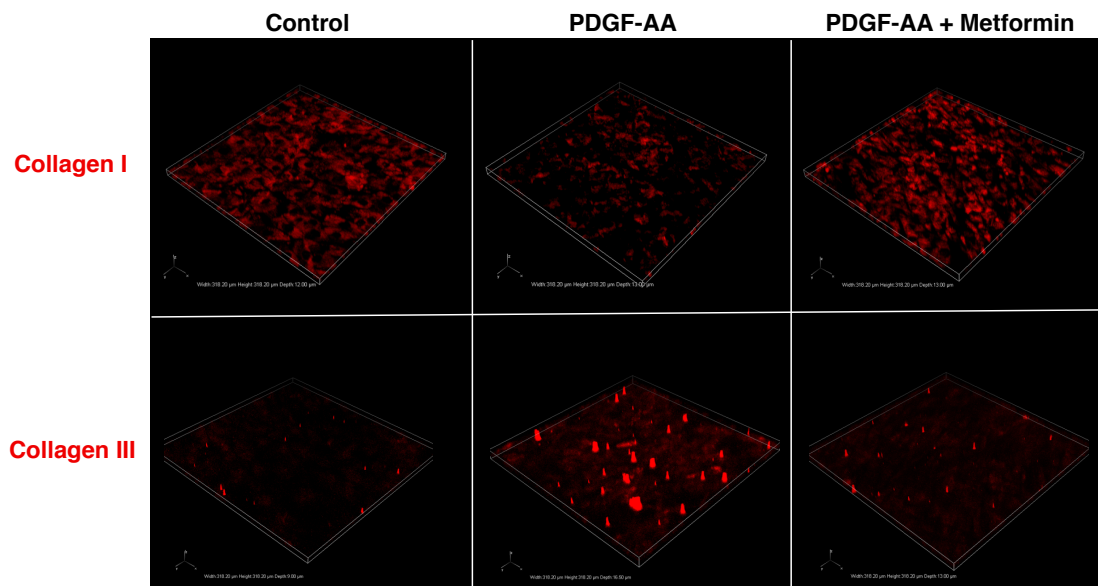

Supplemental Figure 1. Representative image of 3D reconstruction when the SSCT cells cultured on 3D culture membrane. The SSCT cells were cultured on the 3D culture membrane, VECCELL (Vessel Inc.), with PDGF-AA and metformin supplementation. The SSCT cells produced collagen I without PDGF-AA supplementation (control), while the cells treated with PDGF-AA increased collagen III production, but decreased collagen I production like the condition of CTS patient in vivo (PDGF-AA). The production of collagen III by PDGF-AA was inhibited by metformin supplementation, which increased collagen I like the control (PDGF-AA + Metformin).
